# Supplementary material
Source: publisher figshare collection journal article supplement (https://acs.figshare.com/ndownloader/files/4011760)
Supplement: Supplementary file 1 [file 4011760]

# Factors influencing the bioaccumulation of persistent organic pollutants in food webs of the Scheldt estuary

Evy Van Ael, Adrian Covaci, Krishna Das, Gilles Lepoint, Ronny Blust and Lieven Bervoets

## Summary

S1 - S3: Methods and Quality Control for POP analysis

S4 - S5: Table SI-1. Mean lipid content, weight and total length of the collected species, together with median concentrations, separated per location.

S6: Table SI-2. Statistics for significant correlations between POP concentrations and lipid content in biota.

S7: Table SI-3: Mean ( $\pm$ SD) of  $\delta^{13}\text{C}$  and  $\delta^{15}\text{N}$  values (‰) of all samples and number of measurements per location.

## POP analyses

The individual PCB standards were obtained from Dr. Ehrenstorfer Laboratories (Augsburg, Germany), standards of OCPs were obtained from Accustandard (New Haven, CT, USA) and PBDE standard mixtures were obtained from Wellington Laboratories (Guelph, Ontario, Canada). CB 143, BDE 77 and  $\epsilon$ -HCH were used for the quantification of the analytes. Hexane, acetone, dichloromethane, *iso*-octane (all pesticide grade) and concentrated sulfuric acid (analytical grade) were obtained from Merck (Darmstadt, Germany). Silica gel 60 (63-230 mesh) and anhydrous Na<sub>2</sub>SO<sub>4</sub> (Merck) were heated at 150 °C for 24 h. All solvents used for the analysis (acetone, dichloromethane, *iso*-octane, *n*-hexane, methanol) were of SupraSolv grade (Merck, Darmstadt, Germany). Sodium sulphate, concentrated sulfuric acid (analytical grade) and silica gel (0.063-0.200 mm), all from Merck, were pre-washed with *n*-hexane and heated overnight at 150 °C before use. Extraction thimbles (25 x 100 mm, Whatman<sup>®</sup>, England) were pre-extracted for 1 h with hexane/acetone (3/1; v/v) and dried at 100 °C for 12 h. Empty polypropylene columns for clean-up (25 mL) were purchased from Alltech (Lokeren, Belgium).

From the biota samples, an adequate amount (between 1 and 5 g) was ground with anhydrous Na<sub>2</sub>SO<sub>4</sub>, spiked with internal standards (CB 143, BDE 77, and  $\epsilon$ -HCH) and extracted for 2 h by hot Soxhlet with 80 ml hexane/acetone (3/1; v/v). After lipid determination on an aliquot of the extract, the rest of the extract was cleaned-up on 8 g acid silica and analytes were eluted with 20 ml hexane and 15 ml dichloromethane. The eluate was concentrated and reconstituted in 100  $\mu$ l *iso*-octane.

For sediment samples, the same procedure was repeated, but 5 g of activated copper powder was mixed with the sample (3 g) and an extra internal standard (<sup>13</sup>C-BDE 209) was added before Soxhlet extraction. During the clean-up step, copper powder (2 g) was also added on top of the acid silica. The rest of the clean-up procedure was similar to the biota protocol, except for lipid determination.

PBDEs, chlordanes and HCHs were measured with an Agilent 6890-5973 gas chromatograph coupled with a mass spectrometer system (GC-MS). The GC was equipped with a 30 m x 0.25 mm x 0.25  $\mu$ m DB-5ms capillary column (J&W Scientific, Folsom, CA, USA) and the MS was operated in electron capture negative ionisation (ECNI) mode. Methane was used as reagent gas and the ion source, quadrupole and interface temperatures were set at 170, 150 and 300 °C, respectively. The MS was used in the selected ion-monitoring (SIM) mode with ions  $m/z$  = 79 and 81 (for PBDEs and MeO-PBDEs acquired

during the whole run and with 2 most intense characteristic ions for each pesticide. Dwell times were set at 30 ms. One  $\mu\text{l}$  of the cleaned extract was injected in solvent vent mode (injector temperature: 90 °C, held for 0.05 min, then with 700 °C/min to 300 °C and kept for 25 min; vent flow was set at 75 ml/min and the purge vent opened at 1.5 min). Helium was used as carrier gas at constant flow (1.0 ml/min). The temperature of the DB-5ms column was kept at 90 °C for 1.50 min, then increased to 300 °C at a rate of 10 °C/min, kept for 20 min.

For the measurements of PCBs, DDXs, and HCB, we have used an Agilent 6890 GC – 5973 MS system operated in electron impact ionisation (EI) mode equipped with a 25 m x 0.22 mm x 0.25  $\mu\text{m}$  HT-8 capillary column (SGE, Zulte, Belgium). The ion source, quadrupole and interface temperatures were set at 230, 150 and 300 °C, respectively. One  $\mu\text{l}$  of the cleaned extract was injected in cold pulsed splitless mode (injector temperature 90 °C (0.03 min) rising to 300 °C with 700 °C/min), pressure pulse 25 psi and pulse time 1.50 min. The splitless time was 1.50 min. Helium was used as the carrier gas at constant flow (1.0 ml/min). The temperature of the HT-8 column was kept at 90 °C for 1.50 min, then increased to 180 °C at a rate of 15 °C/min (kept for 2.0 min), further increased to 280 °C at a rate of 5 °C/min and finally raised to 300 °C at a rate of 40 °C/min, and kept for 20 min. The MS was used in the selected ion-monitoring (SIM) mode with 2 ions monitored for each PCB homologue group or individual OCP. Dwell times were set to 30 ms.

### **Quality assurance/quality control**

Retention times, ion chromatograms and relative abundance of the monitored ions were used as identification criteria. A deviation of ion abundance ratios within 15% of the mean values for calibration standards was considered acceptable. Quantification was based on five-point calibration curves in which either the sum of  $m/z = 79$  and 81 for PBDEs or the most intense ion from the molecular cluster for PCBs were monitored.

The peaks were positively identified as target compounds if: (1) the retention time matched that of the standard compound within  $\pm 0.1$  min and (2) the signal-to-noise ratio (S/N) was higher than 3:1. Procedural blanks were analyzed simultaneously with every batch of seven samples to check for interferences or contamination from solvent and glassware. Procedural blanks were consistent (RSD < 30%) and therefore the mean value was calculated for each compounds and subtracted from the values in the samples. After blank subtraction,

the *limit of quantification (LOQ)* was calculated as three times the standard deviation of the mean of the blank measurements. For analytes that were not detected in procedural blanks,

LOQs were calculated for a ratio S/N equal to 10. LOQs ranged between 1 and 10 ng/g lipid weight.

Mean  $\pm$  SD recoveries of the internal standards PCB 143 and BDE 77 were  $86 \pm 6\%$  and  $93 \pm 10\%$ , respectively. The analytical procedures were validated through the analysis of certified materials: SRM 1945 - PCBs, PBDEs and OCPs in whale blubber (NIST, National Institute of Standards and Technology) and CRM 536 – PCBs in freshwater sediment (BCR, Community Bureau of Reference of the European Commission). Measured values were deviating less than 20 % from the certified values.

The QC scheme is also assessed through regular participation to the Interlaboratory Comparison Exercise Program for Organic Contaminants in Marine Mammal Tissues organized by the National Institute of Standards and Technology (NIST, Gaithersburg, MD, USA). Results for individual OCPs, PCB and PBDE congeners had a variation coefficient less than 15 % from the target values or  $z$  scores were always  $-2 < z < 2$  (Kucklick et al., 2005, 2007, 2009).

Samples with concentrations below LOQ were calculated as  $f \cdot \text{LOQ}$  with “ $f$ ” being the fraction of samples above LOQ (or the detection frequency) as first described by James et al. (2002). This approach is a more realistic method of replacing non-detects with a certain value than the current procedures of lower bound (replacement with zero), medium bound (replacement with  $\frac{1}{2} \cdot \text{LOQ}$ ) and upper bound (replacement with LOQ). All results were expressed as ng/g wet weight (ww).

## References

- James RA, Hertz-Picciotto I, Willman E, Keller JA, Charles MJ, 2002. Determinants of serum polychlorinated biphenyls and organochlorine pesticides measured in women from the Child Health and Development Study cohort, 1963-1967. *Environ Health Perspect*, 110, 617-624.
- Kucklick JR, Pugh RS, Becker PR, Schantz MM, Wise SA, Rowles TK, 2005. Description and results of the 2003 NIST/NOAA interlaboratory comparison exercise program for organic contaminants in marine mammal tissues. NISTIR 7269, 157 pag.
- Kucklick JR, Pugh RS, Becker PR, Schantz MM, Wise SA, Rowles TK, 2007. Description and results of the 2005 NIST/NOAA interlaboratory comparison exercise program for organic contaminants in marine mammal tissues. NISTIR 7410, 132 pag.
- Kucklick JR, Pugh RS, Becker PR, Schantz MM, Wise SA, Rowles TK, 2009. Description and Results of the 2007 NIST/NOAA Interlaboratory Comparison Exercise Program for Organic Contaminants in Marine Mammal Tissues. National Institute of Standards and Technology, NISTIR 7642, 145 pag.

Table SI-1. Mean lipid content (%), weight (g) and total length (cm) of the collected species for POP analysis, together with median concentrations (ng/g ww, filamentous green algae and sediment in dw), separated per location (Terneuzen, Bath, Antwerpen). N.d.= not detected

| Sample                 |                     |        | N<br>(T/B/A) | Lipid (%) |      |      | Weight (g)* |      |      | Total length<br>(cm)** |      |      | ΣPCBs |      |      | ΣPBDEs |      |      | ΣDDT |      |      | ΣHCH |      |      | Σchlordanes |      |      |
|------------------------|---------------------|--------|--------------|-----------|------|------|-------------|------|------|------------------------|------|------|-------|------|------|--------|------|------|------|------|------|------|------|------|-------------|------|------|
|                        |                     |        |              | T         | B    | A    | T           | B    | A    | T                      | B    | A    | T     | B    | A    | T      | B    | A    | T    | B    | A    | T    | B    | A    | T           | B    | A    |
| Sediment               |                     |        | 2/2/2        | -         |      |      |             |      |      |                        |      |      | 2.29  | 4.28 | 37.6 | 11.0   | 56.8 | 349  | 0.15 | 0.21 | 2.53 | 0.24 | 0.21 | 0.72 | n.d.        | n.d. | n.d. |
| Filamentous algae      |                     |        | 1/1/1        | -         |      |      |             |      |      |                        |      |      | 32.7  | 2.50 | 32.7 | 1.52   | 0.41 | 0.96 | 2.83 | 0.30 | 2.51 | 1.64 | 0.83 | 1.05 | 0.15        | 0.07 | 0.13 |
| Molluscs               |                     |        |              |           |      |      |             |      |      |                        |      |      |       |      |      |        |      |      |      |      |      |      |      |      |             |      |      |
| Mytilus edulis         | Blue mussel         | 4/0/0  | 2.55         | -         | -    |      |             |      |      |                        |      | 94.9 | -     | -    | 0.59 | -      | -    | 3.75 | -    | -    | 0.22 | -    | -    | 0.23 | -           | -    |      |
| Macoma balthica        | Baltic tellin       | 0/2/0  | -            | 2.80      | -    |      |             |      |      |                        |      | -    | 249   | -    | -    | 1.71   | -    | -    | 11.2 | -    | -    | 0.38 | -    | -    | 0.87        | -    |      |
| Littorina littorea     | Common periwinkle   | 4/0/0  | 0.85         | -         | -    |      |             |      |      |                        |      | 22.8 | -     | -    | 0.01 | -      | -    | 0.70 | -    | -    | 0.16 | -    | -    | n.d. | -           | -    |      |
| Polychaeta             |                     |        |              |           |      |      |             |      |      |                        |      |      |       |      |      |        |      |      |      |      |      |      |      |      |             |      |      |
| Nereis diversicolor    | Ragworm             | 0/2/3  | -            | 1.15      | 1.54 |      |             |      |      |                        |      | -    | 55.1  | 110  | -    | 0.48   | 1.20 | -    | 2.93 | 6.08 | -    | 0.44 | 0.40 | -    | 0.22        | 0.62 |      |
| Arenicola marina       | Lugworm             | 3/0/0  | 1.00         | -         | -    |      |             |      |      |                        |      | 22.4 | -     | -    | 0.24 | -      | -    | 0.85 | -    | -    | 0.10 | -    | -    | n.d. | -           | -    |      |
| Crustacea              |                     |        |              |           |      |      |             |      |      |                        |      |      |       |      |      |        |      |      |      |      |      |      |      |      |             |      |      |
| Chaetogammarus marinus |                     | 1/1/0  | 1.47         | 1.10      | -    |      |             |      |      |                        |      | 33.5 | 33.7  | -    | 0.39 | 0.13   | -    | 0.39 | 0.98 | -    | 3.28 | 0.75 | -    | n.d. | n.d.        | -    |      |
| Crangon crangon        | Brown shrimp        | 2/4/0  | 0.77         | 0.94      | -    |      |             |      |      |                        |      | 43.2 | 25.0  | -    | 0.01 | 0.01   | -    | 0.48 | 0.62 | -    | 0.03 | 0.03 | -    | n.d. | n.d.        | -    |      |
| Carcinus maenas        | Shore crab          | 2/11/0 | 0.68         | 0.64      | -    | 41.1 | 38.5        | -    | 5.40 | 5.40                   | -    | 39.0 | 88.8  | -    | 0.15 | 0.26   | -    | 0.73 | 1.82 | -    | 0.25 | 0.06 | -    | n.d. | n.d.        | -    |      |
| Eriocheir sinensis     | Chinese mitten crab | 0/3/4  | -            | 0.61      | 0.75 | -    | 67.0        | 29.8 | -    | 5.30                   | 4.10 | -    | 128   | 62.3 | -    | 2.91   | 0.99 | -    | 6.54 | 1.98 | -    | 0.20 | 0.06 | -    | 2.17        | 1.09 |      |
| Fish                   |                     |        |              |           |      |      |             |      |      |                        |      |      |       |      |      |        |      |      |      |      |      |      |      |      |             |      |      |
| Platichthys flesus     | European flounder   | 5/5/6  | 0.74         | 1.22      | 0.62 | 57.9 | 90.5        | 167  | 16.5 | 24.2                   | 20   | 39.1 | 124.2 | 99.0 | 0.29 | 1.05   | 0.74 | 1.34 | 4.77 | 2.73 | 0.05 | 0.05 | 0.05 | 0.08 | 0.18        | 0.08 |      |

| Sample                        |                   | N<br>(T/B/A) | Lipid (%) |      |      | Weight (g)* |      |      | Total length<br>(cm)** |      |      | ΣPCBs |       |       | ΣPBDEs |      |      | ΣDDT |      |      | ΣHCH |      |      | Σchlordanes |      |      |
|-------------------------------|-------------------|--------------|-----------|------|------|-------------|------|------|------------------------|------|------|-------|-------|-------|--------|------|------|------|------|------|------|------|------|-------------|------|------|
|                               |                   |              | T         | B    | A    | T           | B    | A    | T                      | B    | A    | T     | B     | A     | T      | B    | A    | T    | B    | A    | T    | B    | A    | T           | B    | A    |
| <i>Solea solea</i>            | Common sole       | 1/4/6        | 0.59      | 0.70 | 0.59 | 19.0        | 169  | 19.4 | 13.2                   | 23.4 | 13.5 | 37.4  | 44.2  | 47.7  | 0.13   | 0.24 | 0.18 | 0.88 | 1.60 | 1.25 | 0.05 | 0.05 | 0.05 | n.d.        | n.d. | n.d. |
| <i>Osmerus eperlanus</i>      | Smelt             | 2/7/0        | 1.45      | 1.21 | -    | 50.4        | 36.2 | -    | 19.3                   | 17.3 | -    | 139   | 76.1  | -     | 0.98   | 0.67 | -    | 6.63 | 3.05 | -    | 0.05 | 0.05 | -    | 0.24        | 0.08 | -    |
| <i>Sprattus sprattus</i>      | European sprat    | 0/1/0        | -         | 0.96 | -    | -           | 4.93 | -    | -                      | 10.6 | -    | -     | 210   | -     | -      | 1.00 | -    | -    | 8.47 | -    | -    | 0.17 | -    | -           | n.d. | -    |
| <i>Sander lucioperca</i>      | Pike-perch        | 0/2/3        | -         | 0.49 | 0.72 | -           | 49.8 | 55.3 | -                      | 17.6 | 16.7 | -     | 116.8 | 152.7 | -      | 0.80 | 1.77 | -    | 3.96 | 5.20 | -    | 0.11 | 0.15 | -           | 0.08 | 0.16 |
| <i>Trisopterus luscus</i>     | Pouting           | 3/4/0        | 0.51      | 0.68 | -    | 7.17        | 11.3 | -    | 8.50                   | 9.90 | -    | 24.5  | 26.6  | -     | 0.13   | 0.14 | -    | 0.84 | 0.86 | -    | 0.05 | 0.05 | -    | 0.08        | 0.08 | -    |
| <i>Myoxocephalus scorpius</i> | Shorthorn sculpin | 2/6/0        | 0.72      | 0.90 | -    | 61.6        | 74.9 | -    | 16.5                   | 16.5 | -    | 31.2  | 28.7  | -     | 0.19   | 0.22 | -    | 1.16 | 0.88 | -    | 0.05 | 0.05 | -    | n.d.        | n.d. | -    |
| <i>Anguilla anguilla</i>      | European eel      | 0/0/6        | -         | -    | 17.7 | -           | -    | 273  | -                      | -    | 52.2 | -     | -     | 1290  | -      | -    | 8.76 | -    | -    | 49.3 | -    | -    | 2.24 | -           | -    | 5.67 |

\*some crabs were missing legs, so crab weight may not be accurate

\*\*for crabs, total length was the length of the carapax

Table SI-2. Statistics for all significant correlations (Pearson's Product Moment) between POP concentrations (ww) and lipid content in biota.

| Terneuzen (N=30) |          |                | Bath (N=52) |          |                | Antwerp (N=26) |          |                | Antwerp (N=26)               |          |                |
|------------------|----------|----------------|-------------|----------|----------------|----------------|----------|----------------|------------------------------|----------|----------------|
| Compound         | p-value  | r <sup>2</sup> | Compound    | p-value  | r <sup>2</sup> | Compound       | p-value  | r <sup>2</sup> | Compound                     | p-value  | r <sup>2</sup> |
| PCB 28           | 0.0014   | 0.311          | PCB 18      | < 0.0001 | 0.581          | PCB 28         | < 0.0001 | 0.958          | pp-DDE                       | < 0.0001 | 0.934          |
| PCB 52           | 0.0015   | 0.306          | PCB 52      | < 0.0001 | 0.366          | PCB 52         | < 0.0001 | 0.973          | op-DDD                       | < 0.0001 | 0.590          |
| PCB 49           | 0.0003   | 0.383          | PCB 44      | < 0.0001 | 0.652          | PCB 49         | < 0.0001 | 0.823          | pp-DDD                       | < 0.0001 | 0.964          |
| PCB 44           | 0.0004   | 0.364          | PCB 95      | < 0.0001 | 0.563          | PCB 44         | < 0.0001 | 0.933          | pp-DDT                       | < 0.0001 | 0.925          |
| PCB 95           | < 0.0001 | 0.537          | PCB 101     | 0.0004   | 0.225          | PCB 95         | < 0.0001 | 0.872          | OxC                          | < 0.0001 | 0.790          |
| PCB 101          | 0.0006   | 0.348          | PCB 87      | < 0.0001 | 0.371          | PCB 101        | < 0.0001 | 0.875          | TN                           | < 0.0001 | 0.927          |
| PCB 99           | 0.0045   | 0.254          | PCB 110     | < 0.0001 | 0.544          | PCB 99         | < 0.0001 | 0.926          | CN                           | < 0.0001 | 0.921          |
| PCB 87           | 0.0003   | 0.381          | PCB 151     | < 0.0001 | 0.474          | PCB 87         | < 0.0001 | 0.855          | TC                           | < 0.0001 | 0.836          |
| PCB 110          | 0.0001   | 0.422          | PCB 149     | < 0.0001 | 0.390          | PCB 110        | < 0.0001 | 0.917          | CC                           | < 0.0001 | 0.888          |
| PCB 118          | 0.0031   | 0.272          | PCB 174     | < 0.0001 | 0.504          | PCB 118        | < 0.0001 | 0.950          | b-HCH                        | < 0.0001 | 0.990          |
| PCB 105          | 0.0034   | 0.268          | PCB 171     | < 0.0001 | 0.330          | PCB 105        | < 0.0001 | 0.952          | g-HCH                        | < 0.0001 | 0.986          |
| PCB 151          | 0.0009   | 0.332          | PCB 195     | < 0.0001 | 0.374          | PCB 151        | < 0.0001 | 0.771          | BDE 28                       | < 0.0001 | 0.827          |
| PCB 149          | < 0.0001 | 0.538          | PCB 194     | 0.0004   | 0.223          | PCB 149        | < 0.0001 | 0.867          | BDE 47                       | < 0.0001 | 0.867          |
| PCB 146          | 0.0007   | 0.344          | PCB 206     | < 0.0001 | 0.557          | PCB 146        | < 0.0001 | 0.941          | BDE 100                      | < 0.0001 | 0.911          |
| PCB 153          | 0.0018   | 0.298          | op-DDE      | < 0.0001 | 0.699          | PCB 153        | < 0.0001 | 0.952          | BDE 99                       | 0.0008   | 0.381          |
| PCB 138          | 0.0009   | 0.328          | pp-DDE      | < 0.0001 | 0.293          | PCB 138        | < 0.0001 | 0.950          | BDE 154                      | < 0.0001 | 0.475          |
| PCB 128          | 0.0004   | 0.361          | op-DDD      | < 0.0001 | 0.786          | PCB 128        | < 0.0001 | 0.921          | BDE 153                      | < 0.0001 | 0.862          |
| PCB 187          | < 0.001  | 0.423          | pp-DDD      | < 0.0001 | 0.725          | PCB 156        | < 0.0001 | 0.895          | Antwerp (eel excluded, N=20) |          |                |
| PCB 183          | 0.0038   | 0.262          | TC          | < 0.0001 | 0.739          | PCB 187        | < 0.0001 | 0.923          | Compound                     | p-value  | r <sup>2</sup> |
| PCB 177          | < 0.0001 | 0.518          | BDE 28      | 0.0006   | 0.212          | PCB 183        | < 0.0001 | 0.936          | PCB 18                       | 0.0009   | 0.469          |
| PCB 171          | 0.002    | 0.292          | BDE 100     | < 0.0001 | 0.363          | PCB 174        | < 0.0001 | 0.835          | PCB 28                       | 0.0011   | 0.455          |
| pp-DDE           | 0.0027   | 0.279          | BDE 154     | < 0.0001 | 0.438          | PCB 177        | < 0.0001 | 0.951          | PCB 44                       | 0.0391   | 0.216          |
| op-DDD           | < 0.0001 | 0.747          |             |          |                | PCB 171        | < 0.0001 | 0.939          | HCb                          | < 0.0001 | 0.669          |
| TN               | 0.0003   | 0.377          |             |          |                | PCB 172        | < 0.0001 | 0.941          | op-DDD                       | < 0.0001 | 0.700          |
| CN               | < 0.0001 | 0.431          |             |          |                | PCB 180        | < 0.0001 | 0.872          | pp-DDD                       | 0.0013   | 0.444          |
| TC               | < 0.0001 | 0.693          |             |          |                | PCB 170        | < 0.0001 | 0.885          | TN                           | 0.0016   | 0.435          |
| BDE 28           | < 0.0001 | 0.451          |             |          |                | PCB 199        | < 0.0001 | 0.951          | TC                           | < 0.0001 | 0.766          |
| BDE 100          | 0.0026   | 0.281          |             |          |                | PCB 195        | < 0.0001 | 0.949          | CC                           | < 0.0001 | 0.643          |
| BDE 99           | < 0.0001 | 0.568          |             |          |                | PCB 194        | < 0.0001 | 0.946          | a-HCH                        | 0.0022   | 0.414          |
|                  |          |                |             |          |                | PCB 205        | < 0.0001 | 0.585          | b-HCH                        | 0.0095   | 0.319          |
|                  |          |                |             |          |                | PCB 206        | < 0.0001 | 0.926          | g-HCH                        | 0.0004   | 0.516          |
|                  |          |                |             |          |                | PCB 209        | < 0.0001 | 0.866          | BDE 28                       | 0.0009   | 0.464          |
|                  |          |                |             |          |                | HCb            | < 0.0001 | 0.948          | BDE 99                       | 0.0243   | 0.252          |

Only correlations with r<sup>2</sup> > 0.2 are shown.

Table SI-3. Mean ( $\pm$ SD) of  $\delta^{13}\text{C}$  and  $\delta^{15}\text{N}$  values (‰) of all samples and number of measurements (N) per location.

|                               |                     |              | $\delta^{13}\text{C}$ |                  |                  | $\delta^{15}\text{N}$ |                 |                 |
|-------------------------------|---------------------|--------------|-----------------------|------------------|------------------|-----------------------|-----------------|-----------------|
| Sample                        |                     | N<br>(T/B/A) | Terneuzen             | Bath             | Antwerpen        | Terneuzen             | Bath            | Antwerpen       |
| SPM                           |                     | 1/1/1        | -25,3                 | -26,3            | -27,7            | 2,79                  | 4,59            | 2,50            |
| Filamentous algae             |                     | 2/2/2        | -16,5 $\pm$ 0,08      | -19,0 $\pm$ 0,00 | -14,0 $\pm$ 0,51 | 22,3 $\pm$ 0,39       | 15,3 $\pm$ 0,43 | 15,0 $\pm$ 1,07 |
| Oligochaeta                   |                     | 1/2/2        | -19,9                 | -22,9 $\pm$ 0,21 | -26,5 $\pm$ 0,03 | 15,9                  | 17,5 $\pm$ 0,31 | 17,1 $\pm$ 0,09 |
| Molluscs                      |                     |              |                       |                  |                  |                       |                 |                 |
| <i>Mytilus edulis</i>         | Blue mussel         | 10/0/0       | -24,4 $\pm$ 0,78      | /                | /                | 14,1 $\pm$ 0,49       | /               | /               |
| <i>Macoma balthica</i>        | Baltic tellin       | 2/10/0       | -20,9 $\pm$ 0,04      | -23,8 $\pm$ 0,71 | /                | 14,2 $\pm$ 0,20       | 17,7 $\pm$ 0,88 | /               |
| <i>Littorina littorea</i>     | Common periwinkle   | 10/0/0       | -17,3 $\pm$ 0,23      | /                | /                | 16,6 $\pm$ 0,53       | /               | /               |
| Polychaeta                    |                     |              |                       |                  |                  |                       |                 |                 |
| <i>Nereis diversicolor</i>    | Ragworm             | 0/11/9       | /                     | -18,2 $\pm$ 0,6  | -19,0 $\pm$ 1,36 | /                     | 17,5 $\pm$ 0,41 | 21,6 $\pm$ 0,74 |
| <i>Arenicola marina</i>       | Lugworm             | 9/0/0        | -18,1 $\pm$ 1,01      | /                | /                | 17,5 $\pm$ 0,78       | /               | /               |
| Crustacea                     |                     |              |                       |                  |                  |                       |                 |                 |
| <i>Chaetogammarus marinus</i> |                     | 2/5/0        | -19,2 $\pm$ 1,09      | -19,4 $\pm$ 0,15 | /                | 16,2 $\pm$ 0,49       | 18,8 $\pm$ 0,68 | /               |
| <i>Corophium volutator</i>    |                     | 1/0/1        | -17,3                 | /                | -26,3            | 13,7                  | /               | 17,6            |
| <i>Crangon crangon</i>        | Brown shrimp        | 8/13/0       | -19,1 $\pm$ 1,09      | -22,3 $\pm$ 1,36 | /                | 18,2 $\pm$ 1,20       | 19,8 $\pm$ 0,61 | /               |
| <i>Carcinus maenas</i>        | Shore crab          | 3/12/0       | -20,6 $\pm$ 0,92      | -21,8 $\pm$ 1,09 | /                | 18,0 $\pm$ 0,63       | 19,0 $\pm$ 0,91 | /               |
| <i>Eriocheir sinensis</i>     | Chinese mitten crab | 0/3/4        | /                     | -27,0 $\pm$ 1,05 | -26,7 $\pm$ 18,0 | /                     | 17,7 $\pm$ 3,62 | 21,0 $\pm$ 0,71 |
| Fish                          |                     |              |                       |                  |                  |                       |                 |                 |
| <i>Platichthys flesus</i>     | European flounder   | 5/8/8        | -20,7 $\pm$ 3,30      | -22,6 $\pm$ 1,71 | -25,4 $\pm$ 0,82 | 18,2 $\pm$ 0,57       | 21,0 $\pm$ 1,04 | 21,5 $\pm$ 0,48 |
| <i>Solea solea</i>            | Common sole         | 1/4/6        | -22,0                 | -20,3 $\pm$ 1,25 | -22,7 $\pm$ 1,10 | 17,7                  | 19,2 $\pm$ 1,22 | 20,0 $\pm$ 0,69 |
| <i>Osmerus eperlanus</i>      | Smelt               | 2/7/0        | -20 $\pm$ 0,2         | -22,9 $\pm$ 2,10 | /                | 20,6 $\pm$ 0,57       | 21,5 $\pm$ 0,91 | /               |
| <i>Sprattus sprattus</i>      | European sprat      | 0/2/0        | /                     | -23,3 $\pm$ 2,25 | /                | /                     | 20,9 $\pm$ 1,56 | /               |
| <i>Sander lucioperca</i>      | Pike-perch          | 0/3/3        | /                     | -26,0 $\pm$ 2,3  | -27,6 $\pm$ 1,51 | /                     | 21,6 $\pm$ 1,08 | 20,6 $\pm$ 0,59 |
| <i>Trisopterus luscus</i>     | Pouting             | 3/4/0        | -18,4 $\pm$ 0,4       | -21,8 $\pm$ 1,84 | /                | 17,2 $\pm$ 0,40       | 18,8 $\pm$ 0,88 | /               |
| <i>Myoxocephalus scorpius</i> | Shorthorn sculpin   | 2/6/0        | -19,3 $\pm$ 1,1       | -18,9 $\pm$ 1,68 | /                | 20,3 $\pm$ 0,21       | 19,5 $\pm$ 1,04 | /               |
| <i>Anguilla anguilla</i>      | European eel        | 0/0/6        | /                     | /                | -27,4 $\pm$ 1,09 | /                     | /               | 21,1 $\pm$ 2,05 |
